# Supplementary material
Source: ML conference proceedings conference paper supplement (https://proceedings.neurips.cc/paper_files/paper/2023/hash/8c3caae2f725c8e2a55ecd600563d172-Abstract.html)
Supplement: Supplementary file 1 [file 8c3caae2f725c8e2a55ecd600563d172-Supplemental-Conference.pdf]

## A Resource scaling for quantum backpropagation methods

What comprises classical memory and time complexity, is purposely left vague. The details depend on the constituent types of operations needed to compute a function and its gradients, as well as the memory access model available. But, details aside, backpropagation merely refers to gradient computation in a particular manner, and, any reasonably successful implementation of it incurs a constant overhead in relative complexity, as captured by Equations (1) and (2). With this in mind, we elaborate on the operational definition of quantum backpropagation scaling in terms of memory. Thereafter, we explain the failure of various current gradient methods to achieve backpropagation scaling.

### A.1 Memory complexity of the function

Recall the function of interest  $F(\theta) = \text{tr}[\rho(\theta)O]$ , where  $O$  is an observable and  $\rho(\theta)$  is a parameterized quantum state built from  $M$  parameters, acting either on an unknown initial state  $\rho$  or simplified initial state  $\rho = |0\rangle\langle 0|$ . Classifying the memory used to compute the function as a combination of  $n$  qubits, plus storage for each of the  $M$  parameters with appropriate precision,  $\delta$ , implies

$$\text{MEMORY}(F(\theta)) = \tilde{O}(n + M \log(1/\delta)). \quad (10)$$

To derive the computational cost, assume unit cost access to any element of the circuit family  $\{U_j\}$ . If an incoherent measurement scheme is used, measuring  $O$  and estimating  $F(\theta)$  to an acceptable fixed precision,  $\varepsilon$ , on repeated preparations of  $\rho(\theta)$  incurs a cost that scales as  $\text{TIME}(F(\theta)) = \tilde{O}(\frac{M}{\varepsilon^k})$ , for some integer  $k$ . This sets the scene for the computational requirements of computing  $F'(\theta)$ , which should, importantly, be achieved with a modest space overhead to truly replicate backpropagation.

### A.2 Current gradient methods

Replicating classical backpropagation efficiency in a quantum setting requires more effort, which we elaborate on next by discussing how and why current gradient methods fail to achieve this efficiency. For further illustration, Figure 2 provides a hypothetical comparison between the popular gradient method – the parameter-shift rule – and true quantum backpropagation. The plot incorporates assumptions about time to compute native quantum operations taken from Babbush et al. [2021].

#### A.2.1 Naive sampling

The gradient of the function  $F(\theta)$  expressed in Equation (4) also takes a simpler form using the parameter-shift rule and properties of Pauli generators [Mitarai et al., 2018, Schuld et al., 2019]

$$[F'(\theta)]_{\theta_k} = F(\theta + \frac{\pi}{2} \hat{\theta}_k), \quad (11)$$

where  $\hat{\theta}_k$  is a unit vector along the  $k^{\text{th}}$  direction of  $\theta$ . Thus far, sampling schemes constructed to estimate (11), perform a destructive measurement that typically only retrieves a partial amount of information for one component of the gradient. As a result, reducing the infinity norm error in the gradient such that we expect  $\|F'(\theta) - \hat{F}'(\theta)\|_\infty \leq \varepsilon$  with reasonable probability, has a cost that scales like converging each component, i.e.

$$\text{TIME}(F'(\theta)) \propto M \log M \text{TIME}(F(\theta)) \quad (12)$$

$$= \tilde{O}(M^2/\varepsilon^2). \quad (13)$$

While this quadratic dependence on the number of parameters may not seem problematic, a linear dependence was the necessary catalyst in the age of modern deep learning, with overparameterized networks that perform exceedingly well on practical tasks.

#### A.2.2 Fast gradient algorithm

A method put forth by Jordan [2005] numerically estimates the gradient of a classical black-box function at a given point, using a quantum computer. The algorithm impressively requires a single black-box query to estimate the full gradient with a desired precision, whilst satisfying the memory

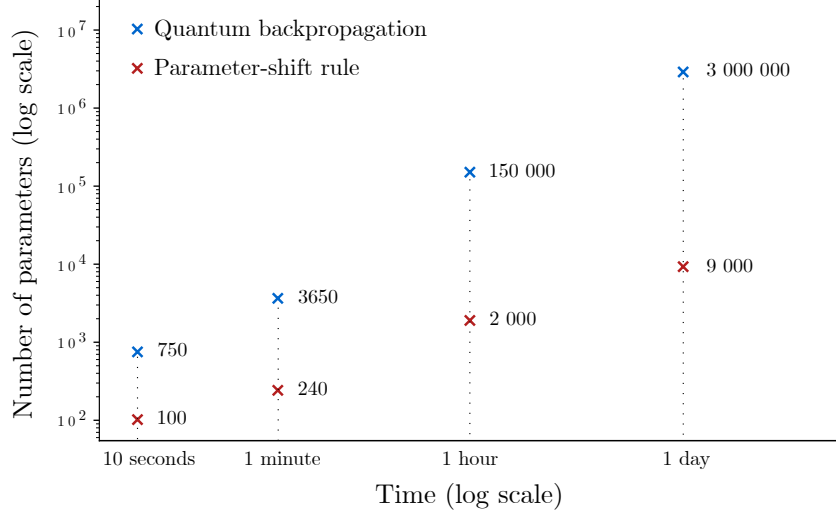

Figure 2: **Quantum backpropagation scaling.** The parameter-shift rule is plotted alongside true quantum backpropagation scaling. On the  $x$ -axis is time in number of seconds required to compute a single estimate of the gradient in log scale, with common time points stated explicitly. On the  $y$ -axis is the number of parameters, also in log scale, that may be optimized using each method, for a given amount of time. We make simple assumptions, motivated from the work in [Babbush et al. \[2021\]](#). Namely, we assume a minimum system size of  $n = 100$  qubits. Further, assuming a favourable time of  $10\mu s$  to compute one parameterised operation (which is 1 order of magnitude less than the time to compute one Toffoli gate), the time for one primitive is lower bounded by  $100 \times 10\mu s = T_q$ . Scaling in time is then roughly  $M^2 \cdot T_q$  for the parameter-shift rule and  $M \cdot \text{polylog}(M) \cdot T_q$  for quantum backpropagation. Furthermore,  $\varepsilon = O(1)$ .

requirement in (2). We elaborate on the connection between this approach and backpropagation on a quantum computer when the function considered is classical and reversible, in Appendix B.1. But, as shown by [Gilyén et al. \[2019\]](#), when parameters are considered to be rotation angles like those in variational circuits, a different query model needs to be applied and the original single-query advantage becomes unattainable. With the appropriate query model, the known bounds imply a computational cost of  $\tilde{O}(M\sqrt{M}/\varepsilon^2)$  using amplitude estimation, and, in a high precision regime,  $\tilde{O}(M\sqrt{M}/\varepsilon)$  is worst-case optimal even with commuting Pauli operators [\[Huggins et al., 2021\]](#). This worst-case bound was proved in a setting where operators commute, indicating that commutativity need not be helpful in other settings.

### A.2.3 Simultaneous perturbation stochastic approximation (SPSA) algorithm

A few studies have investigated the use of the simultaneous perturbation stochastic approximation (SPSA) algorithm to optimize parameterized quantum circuits [\[Benedetti et al., 2019, Hoffmann and Brown, 2022, Gacon et al., 2021\]](#). It is argued that SPSA is computationally efficient since it requires two function evaluations to estimate the gradient, irrespective of  $M$ . This seemingly satisfies the scaling we require, however, the approximation of the gradient has limited accuracy which affects the number of optimization steps needed for SPSA to converge to a minimum. As  $M$  increases, the variance of the gradient estimate increases and, thus, to counteract this, a smaller learning rate must be used - increasing the number of optimization steps - or more samples are needed to estimate the gradient with an appropriate accuracy at every step. In either case, one cannot escape a dependence on  $M$ , which indirectly affects the number of function evaluations needed to estimate gradients or perform gradient-based optimization adequately. More formally, the gradient estimator for component  $j$  of a function, given by SPSA, is

$$\bar{F}'(\theta)_j = \frac{F(\theta + c\Delta) - F(\theta - c\Delta)}{2c\Delta_j} \quad (14)$$

where  $c$  is a step size constant and  $\Delta \in \mathbb{R}^M$  is a size  $M$  random variable with independent, zero-mean, bounded second moments, and bounded inverse moments, i.e.  $\mathbb{E}(|\Delta_j|^{-1})$  is uniformly bounded for all

568  $j$ . A common choice for  $\Delta$  is a Bernoulli random variable with equal probabilities of being  $+1$  or  $-1$   
569 for every entry.

570 Consider a special case,  $F$ , for pedagogical purposes such that the gradient at the point  $\theta$  is a  
571 constant  $g$  along all coordinates, the function is nearly linear at the point examined, and the number  
572 of coordinates  $M$  is large in a central limit theorem sense. We then have,  $F'(\theta)_j = g$  for all  $j$ ,  
573 and  $F(\theta + c\Delta) \approx F(\theta) + c F'(\theta)^T \Delta = F(\theta) + cg \bar{1}^T \Delta \approx F(\theta) + \mathcal{N}(0, cgM)$ . On a quantum  
574 computer, the estimator will be constructed by taking independent measurements of  $F(\theta \pm c\Delta)$  and  
575 then rescaling the sample mean by  $1/2c\Delta_j$ . We then see that the variance of an individual term in  
576 this case is given by

$$\text{Var}[\bar{F}'(\theta)_j] = \frac{F(\theta)}{c} + gM \quad (15)$$

577 As such the number of samples required to reach a precision  $\epsilon$  with high probability in even a single  
578 gradient component scales as

$$N_s = \frac{F(\theta)/c + gM}{\epsilon^2} \quad (16)$$

579 which clearly increases linearly with the number of components  $M$ , and does not achieve the desired  
580 scaling despite the estimator being constructed from only two function calls. It is also worth noting  
581 that the estimates for each component of the gradient are highly correlated across the vector, which  
582 can lead to larger errors than would be otherwise expected under alternative norms. This is intuitively  
583 expected, as it should not generally be possible to determine  $M$  independent random variables from  
584 a single value without increasing the precision of the estimates at least proportionately. We note in  
585 passing that generally to obtain an unbiased estimator one must also take  $c$  to be on the order of  $\epsilon$ , but  
586 this dependence can be improved with higher order formulas to  $\epsilon^{-k}$  for some  $k > 1$  [Spall, 2000],  
587 but this is not central to our study.

## 588 B Classical backpropagation in quantum circuits

589 In order to frame the discussion, it is worth considering a number of closely related setups as they  
590 would appear if performed on a quantum computer. In particular, in similar notation and cost models,  
591 its interesting to consider how classical backpropagation would look in a quantum circuit for a  
592 deterministic classical function and perhaps the closer classical analog, classical parameterized  
593 Markov processes on the space of probabilistic bits.

### 594 B.1 Classical functions

595 First we will look at an entirely classical function using reversible arithmetic for the purposes of  
596 analogy, using a simplified function but with simple generalizations available. This will be helpful for  
597 setting the stage in terms of notation and scaling, and also help make a connection with the gradient  
598 algorithm of Jordan [2005]. Consider a classical function  $f$  that depends on some set of parameters  
599  $x \in \mathbb{R}^M$  via more elementary functions  $f_i$ . For this example, we assume a simple dependency  
600 graph for the overall function  $f : \mathbb{R}^M \rightarrow \mathbb{R}$  is the simple composition of elementary functions,  
601  $f = f_N \circ f_{N-1} \circ \dots \circ f_1$ . Given this structure, we denote a set of intermediate variables  $z_i$ , such that  
602  $z_i = x_i$  for  $i \in [1, M]$  and  $z_i = f_i(z_{\alpha(i)})$  for  $i \in [M+1, n]$  where  $\alpha(i)$  is the subset of variables  
603 needed to evaluate  $f_i$ , noting that we are implicitly including a trivial set of elementary functions  $f_i$   
604 that are simply the identity operation. We also assume that no  $z_i$  depends on itself, each  $z_i$  appears  
605 exactly once, and derivatives of the elementary operations are readily available, that is a simple  
606 function for evaluating  $f'_i(z)$  is available for any input  $z$ .

607 Given these definitions, we are ready to describe the algorithm for obtaining the gradient  $\nabla_x f(x)$ .  
608 We consider a universal precision  $\delta$  for all parameters and function values, such that classical numbers  
609 use  $O(\log(1/\delta))$  qubits for their representation. For initialization, we store each of the parameters  
610  $x_i$  in their own quantum register  $|\rangle_x$  to run the circuit fully within the quantum computer. In the  
611 first step, we run the function evaluation in the so-called forward pass and store the intermediate  
612 values  $z_i$  each in their own quantum register  $|\rangle_z$  using the elementary implementations of  $f_i$  as  
613 reversible circuits. Taking now an additional set of auxiliary registers,  $|\rangle_\lambda$  with the same size as the  
614 intermediate variables, we assign  $\lambda_n = 1$ , and compute the backwards pass according to reversible

implementations of  $\lambda_j = \sum_{i \in \beta(j)} \partial z_j f_i(z_{\alpha(i)})$  where  $\beta(i)$  is the outgoing nodes for intermediate variables  $z_i$ . In the final step, we may simply read off the  $\lambda$  register to find  $\nabla_x f(x) = \lambda_{1:M}$ .

Considering a general auxiliary register  $| \rangle_A$ , these steps may be written in quantum form as

$$|x\rangle_x |0\rangle_z |0\rangle_\lambda |0\rangle_A \xrightarrow{\text{Forward}} |x\rangle_x |z\rangle_z |0\rangle_\lambda |r_f\rangle_A \xrightarrow{\text{Backward}} |x\rangle_x |z\rangle_z |\lambda\rangle_\lambda |r_b\rangle_A \quad (17)$$

where  $r_f$  and  $r_b$  denote the state of the arithmetic trash register after the forward and backwards pass respectively. Given our precision specification, the size of each of the  $x$  register is  $\tilde{O}(M)$  and the size of the  $z$  and  $\lambda$  registers are  $\tilde{O}(N)$ . This representation is a bit wasteful in that as the backwards pass proceeds one can overwrite the intermediate values  $z$  with  $\lambda$  when they are no longer needed, but writing it this way clarifies the steps. If we assume a typical setup where the number of free parameters is roughly on par with the number of elementary functions, then we see that the total storage for the primary registers is  $\tilde{O}(M)$  and similar for the ancillary register. Similarly, the amount of computation required in both the forward and backwards pass is  $\tilde{O}(M)$ , or approximately twice the cost of evaluating the function in the forward direction, meeting the scaling requirements of backpropagation with some small overhead for maintaining reversibility.

It is useful to compare some aspects of this approach to the quantum algorithm of Jordan for evaluating gradients of classical functions using a single black box function query [Jordan, 2005]. Considering only the computation, if we approximate the forward pass and backwards pass to each be the same cost as one black box function query, then up to log factors in precision of evaluation this method is a constant factor of two more expensive. Said another way, there is no quantum advantage in evaluating the gradient when one has white box access to the classical function implementation and it satisfies the simple dependencies requirements. In terms of storage requirements, the algorithm of Jordan requires the same  $x$  register, but makes no use of the intermediate variable registers such as  $z$  or  $\lambda$  (which can be combined in real implementations to be approximately the size of the  $x$  register). This use of intermediate storage is sometimes characterized as a form of dynamic programming, where the storage of intermediate variables reduces overall computational complexity. Moreover, this version takes advantage of analytical gradients of the subfunctions which can be evaluated to high precision more easily than depending on the finite difference formulations of gradient algorithms as in Jordan’s technique.

So in summary, both a quantum implementation of classical backpropagation and Jordan’s technique have a computational cost that is constant in the number of parameters if our cost model considers overall function evaluations as the cost model. This represents an exponential improvement over naive finite difference computations or symbolic evaluation of derivatives one element at a time. The backpropagation technique utilizes an extra storage register and knowledge of the problem structure, as is common in dynamic programming, while Jordan’s algorithm needs only black-box queries. Both of the techniques assume bitwise access to the oracle as a classical function.

## B.2 Classical parameterized Markov chains

In the previous section, the comparison of classical backpropagation and Jordan’s algorithm made use of bitwise access to a classical, deterministic function. The case of a classical function encoded in bits helps frame the discussion in not only scaling but also the sense in which classical parameterized functions are perhaps not the best analog for parameterized quantum circuits. A key aspect of this difference was highlighted in Gilyén et al. [2019] by showing that in the black box setting, it was more appropriate to consider current parameterized quantum circuits as a phase or amplitude oracle, in which case they prove a lower bound of at least  $M^{1/2}$  calls to the black box (in contrast to  $O(1)$ ), ruling out the desired backpropagation scaling except for special cases. This contrast motivates asking whether the intuitive origin of this lower bound is related more to the black box nature of the access, the quantum nature of the parameterization, or merely the probabilistic features of the parameterization. Here we show that a classical analog to parameterized quantum circuits, namely parameterized Markov processes do indeed allow the analog of classical backpropagation which helps highlight that the difficulty in achieving constant scaling is due to the quantum nature of the problem.

To draw an analogy between quantum and probabilistic classical states for our purposes, we will introduce a small number of analogous concepts that are considered in greater depth by Baez and Biamonte [2012]. A parameterized quantum state  $|\psi(\theta)\rangle$  is an  $L^2$  normalized state such that

667  $\int_S ds |\psi(s; \theta)|^2 = 1$ , that is often formulated as a parameterized quantum circuit acting on  
 668 a known initial state as  $|\psi(\theta)\rangle = U(\theta)|0\rangle$  where  $U$  is a unitary transformation. In contrast, a  
 669 parameterized classical probability vector  $|\psi(\theta)\rangle$  is a positive  $L^1$  normalized probability vector such  
 670 that  $\int_S ds \psi(s; \theta) = 1$ , that may be formulated as a parameterized classical circuit acting on a  
 671 known reference state as  $|\psi(\theta)\rangle = U(\theta)|0\rangle$  where  $U$  is a left-stochastic operation in this case. As a  
 672 connection between the two, one may consider classical transformations as the set of transformations  
 673 restricted to the diagonal of a quantum density matrix, and note that it is always possible to represent  
 674 a classical probability process as a quantum process, albeit non-uniquely, but the converse is of course  
 675 not true in general.

676 The corresponding analog of expected values of Hermitian operators on quantum states will be  
 677 expected values with diagonal operators  $O$ . Such operators are well defined for expected values on  
 678 both classical and quantum states and are identical when the quantum populations are equal to the  
 679 classical probabilities. In setting up for the computation of gradients with respect to the parameter  
 680 vectors, we will consider objective functions defined by the same observable  $O$  and a sequence of  
 681 operations that each depend on a single parameter. That is, the corresponding classical and quantum  
 682 objectives with these assumptions may be concisely defined by

$$f(\theta) = \int_S ds O(s) \left| \left( \prod_i U_i(\theta_i) \psi^0 \right)(s) \right|^2 = \langle O \rangle_{U(\theta) \psi^0} \quad (18)$$

$$f(\theta)_c = \int_S ds O(s) \left( \prod_i U_i(\theta_i) \psi_c^0 \right)(s) = \langle O \rangle_{U(\theta) \psi_c^0}. \quad (19)$$

683 Our question here will be if the restriction to parameterized classical stochastic processes allows  
 684 the desired scaling in determining gradients of an expected value with the given parameters. The  
 685 evaluation of gradients with respect to parameters in quantum circuits relies largely on the fact  
 686 that anti-Hermitian operators generate unitary evolutions, and we may exploit that relationship to  
 687 determine gradients as expected values explicitly. There is a direct analogy to this for general  
 688 stochastic operators, in that they are generated by so-called infinitesimal stochastic operators, defined  
 689 by  $\sum_i H_{ij} = 0$ . With this definition, in finite dimensions they characterize the family of Markov  
 690 semi-groups via exponentiation as  $U(t) = \exp(Ht)$ . For our purposes, it suffices that this yields a  
 691 well defined operator for evaluation of single parameter derivatives.

692 In order to properly compare the two settings, we need to make clear a number of assumptions on the  
 693 operators  $U_i$  and corresponding operators  $H_i$  that mirror assumptions in the quantum case, allowing  
 694 efficient implementation. To begin, we assume each  $U_i(\theta_i)$  is a simple operation, analogous to a  
 695 quantum gate or Pauli operator, such that it is defined as a tensor product on a classical probabilistic  
 696 bit space, and evaluating the transition probability between two basis states is efficient to do at high  
 697 precision. In general, the basis could change between steps and the process could remain efficient,  
 698 however for simplicity we consider the standard computational basis here. Moreover, we assume that  
 699 the operation that generates the  $U_i$ , which we denote  $H_i$  is simple to evaluate between basis states,  
 700 and has a bounded norm  $\|H_i\| = 1$ , so that parameters  $\theta_i$  have consistent and reasonable scales.  
 701 Similarly, we will restrict ourselves to observables  $O$  with reasonable norms, i.e.  $\|O\| = 1$ .

702 With these assumptions, we investigate derivatives of a classical stochastic process under different  
 703 sampling schemes. Let's imagine we have a stochastic process  $U$ , much like a variational circuit,  
 704 which we write as

$$U(\theta) = \prod_i U_i(\theta_i) \quad (20)$$

705 where each  $U_i$  is a stochastic process with a corresponding generator  $H_i$ , such that

$$U_i(\theta_i) = \exp(\theta_i H_i) \quad (21)$$

$$\partial_{\theta_i} U_i(\theta_i) = H_i U_i(\theta_i) \quad (22)$$

706 We will be sampling the expected value of some observable  $O$  which is a diagonal matrix in our  
 707 construction, and so the function value we are interested in optimizing, given a initial probability  
 708 distribution  $\psi_0$  can be written in a number of ways, but some are

$$f(\theta) = \langle O \rangle_{U(\theta) \psi_0} \quad (23)$$

$$= \int OU(\theta) \psi_0 \quad (24)$$

709 Now if we take the gradient of this function with respect to the parameters, we find

$$\partial_{\theta_i} f(\theta) = \partial_{\theta_i} \langle O \rangle_{U(\theta)\psi_0} \quad (25)$$

$$= \int O \prod_{j<i} U_j \partial_{\theta_i} U_i \prod_{k>i} U_k \psi_0 \quad (26)$$

$$= \int O \prod_{j<i} U_j H_i U_i \prod_{k>i} U_k \psi_0. \quad (27)$$

710 Using this construction, one can store the trajectory and lean on a path-integral formalism to use  
 711 a single sampling process to take independent samples of all the gradient components with each  
 712 stochastic sample that is taken. One way to write this is to borrow the path-integral like formalism  
 713 using resolutions of the identity as

$$\begin{aligned} f(\theta) &= \int O \prod_j U_j \psi_0 \\ &= \sum_{i_1, \dots, i_N} \int O |i_N\rangle \langle i_N| U_N |i_{N-1}\rangle \langle i_{N-1}| U_{N-1} \dots |i_1\rangle \langle i_1| \psi_0 \\ &= \sum_{i_1, \dots, i_N} p(i_1, \dots, i_N) O(i_N) \end{aligned} \quad (28)$$

714 where we use  $p(i_1, \dots, i_N)$  to represent the probability of a particular configuration that was sampled,  
 715 and similarly  $O(i_N)$  for the value of the final configuration. We assume that for each individual  
 716 configuration it is possible to compute the transition probability between individual configurations,  
 717 e.g.  $\langle i_N | U_N | i_{N-1} \rangle$  which is typically true in the classical case as well. As a result, for a given path,  
 718 we use re-weighting to make that path produce an unbiased sample for the gradient component we are  
 719 interested in as well. In particular, writing the same for the shifted gradient estimator for component  
 720  $j$  merely requires substituting the relevant matrix element

$$\langle i_j | U_j | i_{j-1} \rangle \rightarrow \langle i_j | H_j U_j | i_{j-1} \rangle \quad (29)$$

721 hence we can estimate the gradient using samples re-weighted by

$$\partial_{\theta_j} f(\theta) = \sum_{i_1, \dots, i_N} p(i_1, \dots, i_N) \left( \frac{\langle i_j | H_j U_j | i_{j-1} \rangle}{\langle i_j | U_j | i_{j-1} \rangle} \right) O(i_N) \quad (30)$$

722 where the weighting factors we also assume to be efficiently computable by construction of the  
 723 elementary operations  $U_i$ , which is analogous to the quantum generators typically used as well,  
 724 defined as simple operations lifted into large spaces by tensor products. This suggests the following  
 725 procedure for efficiently estimating gradients with respect to parameters in the classical analog of  
 726 quantum variational circuits.

- 727 1. Draw a sample from  $\psi^0$  and store this configuration as  $|i_i\rangle$ , which may be represented  
 728 efficiently as a classical bit string.
- 729 2. For each elementary operation  $U_i$ , sample the next classical configuration with probability  
 730 determined by  $U_i$ , and store the configuration as  $|i_j\rangle$ .
- 731 3. Upon reaching the final configuration, evaluate  $O(i_N)$  from the definition of  $O$  to determine  
 732 the value of the objective.
- 733 4. Using the stored path,  $\{|i_j\rangle\}$ , for each elementary step, sample  $\left( \frac{\langle i_j | H_j U_j | i_{j-1} \rangle}{\langle i_j | U_j | i_{j-1} \rangle} \right) O(i_N)$  and  
 734 store the value in a vector to be used in a running average that determines the gradient.
- 735 5. Repeat this procedure until the uncertainty in the estimate for each gradient component is as  
 736 low as desired.

737 It is easy to see from the above procedure that the variance in the estimate of each individual gradient  
 738 component does not have an explicit dependence on the number of elementary steps. This can be seen  
 739 from Equation (30), which only has an explicit dependence on 3 points in the chain. Alternatively,  
 740 from our assumptions designed to mirror the case of quantum circuits, we know the variance of

these estimators is controlled by the value of the product  $\langle i_j | H_j U_j | i_{j-1} \rangle O(i_N) \leq 1$ , independent of the number of parameters or steps in the sampling process. It may appear that the quantity estimated could be unbounded, but if we move the denominator into  $p$ , the result is again a probability distribution multiplied only by values determined by the numerator here. As a result, analogous to backpropagation in the bitwise function case, by storing the intermediate configurations  $\{|i_j\rangle\}$  at a cost memory of  $O(M)$ , we see that evaluating the gradient requires a number of samples that is independent of  $M$ .

From this, we see that indeed the desired scaling is possible in the case of the analogous classical parameterized stochastic processes on tensor product spaces. The formulation as a sum over paths also allows us to make connection to the gentle measurement results in the main text, in that we are always promised to be in a computational basis state, making it possible to do a gentle measurement at intermediate steps with unit probability. This division allows us to help identify the origin of challenges in achieving backpropagation scaling as a problem with quantum measurement collapse and the inability to read out intermediate states while continuing a computation, rather than the probabilistic formulation of the problem. In addition, one may make the classical generators  $H_i$  non-commutative with each other and suffer no additional difficulties in estimating the gradient components, unlike in the quantum case. It remains an interesting question to better understand the performance separation on practical tasks between quantum variational methods and this type of classical analog, given the advantage in trainability of the classical construction.

## C Polynomial complexity circuits

It is reasonable to ask if we can first rule out backpropagation when only given access to single copies of a state. A useful tool to rule out the possibility of certain tasks is information-theoretic bounds, however, we show here that these are not sufficient to rule out quantum backpropagation scaling on single copies as the task remains information-theoretically viable under the assumption of a polynomial length variational circuit, thanks to classical shadows. On the other hand, standard computational arguments illustrate the difficulty in achieving the desired scaling.

### C.1 Information-efficiency with classical shadows

The idea behind classical shadows is to create a classical representation of a state  $\rho$ , that allows one to affordably estimate other properties of interest, like expectation values of observables [Huang et al., 2020]. In general, the number of samples,  $N$ , needed to predict say,  $\text{Tr}[E_1 \rho], \dots, \text{Tr}[E_K \rho]$  within additive error  $\epsilon$ , with high probability is

$$N = \Omega(\log(K) \max_i \|E_i\|_{\text{shadow}} / \epsilon^2),$$

where  $\|E_i\|_{\text{shadow}}$  is a norm influenced by the particular measurement primitive chosen to implement the classical shadow scheme. While general quantum states can be hard to determine, the additional constraint of a state being generated by a polynomial complexity variational circuit allows us to strengthen our statements.

**Definition 15** (Polynomial complexity circuit). We say a circuit is a *polynomial complexity circuit* if it is composed from a fixed gate set  $G$  that may be applied between any two qubits with a maximum number of gates scaling polynomially in  $n$ , the number of qubits. Additionally, we will call it a *polynomial complexity parameterized circuit* if each gate in the elementary set is defined by a bounded number of parameters.

With this at hand, we have the following.

**Proposition 16** (Information-efficiency of polynomial complexity circuits). *Let  $\rho = |\psi\rangle\langle\psi|$  be the density matrix of a pure state generated from a quantum circuit of polynomial complexity built from a gate set of size  $G$  applied between any two qubits, with at most  $p(n)$  total gates, where  $p(n)$  is a polynomial in the number of qubits,  $n$ . With these definitions, there are at most  $K = (nG)^{2p(n)}$  of these circuits. Then,  $\rho$  can be explicitly determined using  $\Omega(\log(K)/\epsilon^2) = \Omega(2p(n) \log(nG)/\epsilon^2)$  single-copy measurements and a classical search procedure.*

*Proof.* Given that  $|\psi\rangle$  is generated from a polynomial complexity circuit, denote the possible states created by such a circuit as  $|\phi_i\rangle$ . With the above definitions it is easy to see that the total number of

possible states that can be generated by a single step is  $n^2G$ , and hence with  $p(n)$  possible choices, the total number of states is  $K = (nG)^{2p(n)}$ . If the underlying set of operations used to generate the state is unknown, it is still possible to cover the space of two-qubit operations to diamond distance error  $\epsilon$  with a number of operations scaling polynomially in  $1/\epsilon$  and  $p(n)$  [Caro et al., 2022]. If we denote this number of extended operations as  $G'$ , then the argument proceeds as before in terms of asymptotic scaling by replacing  $G$  with  $G'$ . Performing Clifford classical shadows with  $E_i = |\phi_i\rangle\langle\phi_i|$  for  $i = 1, \dots, K$ , one can estimate the fidelity, i.e.  $\text{Tr}[E_i |\psi\rangle\langle\psi|]$ , for all  $i$  within additive error  $\epsilon$  using  $\Omega(\log(K)/\epsilon^2)$  single copies of  $|\psi\rangle$ . Since  $|\psi\rangle$  is generated by one of the  $K$  circuits, searching for an  $E_i$  that provides the maximum fidelity, allows one to find  $\text{Tr}[E_i |\psi\rangle\langle\psi|] = 1$ , with high probability, and thus, explicitly determine  $|\psi\rangle$ , and a circuit that generated it by using classical simulation of the family of circuits, that will generally scale both exponentially in  $n$  and  $K$ .  $\square$

With this knowledge, one may proceed to compute expectation values classically to determine gradients or indeed any desired expected value or feature of the state. Whilst this procedure allows us to determine  $|\psi\rangle$  and a circuit for creating it, executing it incurs quantum hardware costs dominated by the Clifford circuits needed for the classical shadow protocol – which are of polynomial depth, but contain entangling gates which are limiting in practice. Even more concerning, is the classical cost of post-processing. Obtaining the maximum fidelity involves storing  $K = (n + p(n))^{O(p(n))}$  values and searching over them, which can be expensive. Additionally, the final computation of the expectation values needed for backpropagation, requires knowing and storing  $M$  exponentially large matrices, over and above the cost to compute the expectation values. And so, backpropagation scaling remains untenable with this implementation.

## C.2 Computational hardness on polynomial complexity circuits

The result and algorithm (a brute force search) used in Proposition 16 demonstrate the information-theoretic efficiency of determining almost anything one would want to know about a state if we are guaranteed that it is both a pure state and generated by a polynomial complexity circuit. The classical computational procedure is clearly inefficient, but this begs the question of whether an efficient procedure might exist in general, especially given the existence of an efficient procedure for special cases. Here we argue that no efficient procedure can exist in the most general case, unless it is possible to efficiently clone pseudo-random quantum states.

**Proposition 17** (Computational hardness of polynomial complexity circuits). *Under standard cryptographic assumptions, no efficient computational procedure exists to identify a pure state of polynomial complexity to trace distance  $\epsilon$ .*

*Proof.* A pseudo-random quantum state is defined to be a pure state of polynomial complexity that no efficient computational algorithm given a polynomial number of copies of the state can distinguish from the Haar random state. Using the procedure described in Proposition 16, a circuit that can recreate the state to trace distance  $\epsilon$  can be found using a polynomial number copies of the state. If the procedure that finds this circuit is also computationally efficient, then the state can be cloned efficiently, violating the no-cloning theorem for pseudo-random states shown in Ji et al. [2018], which merely rests upon standard cryptographic assumptions.  $\square$

This result demonstrates that even if we know a state is a pure state generated from a polynomial complexity circuit, it is computationally infeasible to identify it under cryptographic assumptions despite the information-theoretic efficiency. This suggests that there are states and observables for which the backpropagation problem could remain challenging, and that the most effective strategies must make use of known structure in the observables and states to achieve computational efficiency in analogy to known special cases.

## D Shadow tomography protocol for gradients

For much of this manuscript it has been assumed that one has complete white-box access to the input state  $\rho = |\psi(\theta)\rangle\langle\psi(\theta)|$ . In a more traditional quantum setting, however, this may not be the case. One may be given access to unknown quantum states, or partially unknown states, and tasked to process them for some machine learning task. In such an instance, the input states are usually referred to as

quantum data, and insights pertaining to this model set up can be found in [Huang et al. \[2021\]](#). In this section, we discuss some details around this model type, which we call a quantum neural network and is defined in Definition (8).

## D.1 Gradients as observables

Before presenting our algorithm for performing quantum backpropagation, we begin with the following remark on quantum neural networks which allows us to exploit a shadow tomography procedure.

**Remark 18** (Gradient of a quantum neural network). The  $k^{\text{th}}$  gradient component of the quantum neural network may be expressed as

$$\begin{aligned}\partial_{\theta_k} \text{QNN}_{\vec{\theta}}(|\varphi\rangle) &= 2 \text{Re} \langle 0 | \langle \varphi | \mathcal{U}^\dagger(\vec{\theta}) Z_0 \partial_{\theta_k} \mathcal{U}(\vec{\theta}) | 0 \rangle | \varphi \rangle \\ &= 2 \text{Re} \langle \Phi_k | \Psi_k \rangle\end{aligned}$$

where

$$\begin{aligned}|\Psi_k\rangle &= (iP_k) e^{i\theta_k P_k} U_k \dots e^{i\theta_1 P_1} U_1 |0\rangle |\varphi\rangle \\ &= e^{i(\theta_k + \frac{\pi}{2}) P_k} U_k \dots e^{i\theta_1 P_1} U_1 |0\rangle |\varphi\rangle \\ |\Phi_k\rangle &= U_{k+1}^\dagger e^{-i\theta_{k+1} P_{k+1}} \dots U_M^\dagger e^{-i\theta_M P_M} Z_0 e^{i\theta_M P_M} U_M \dots e^{i\theta_1 P_1} U_1 |0\rangle |\varphi\rangle.\end{aligned}$$

If one defines

$$\begin{aligned}\mathcal{U}_k^{(\Psi)} &= e^{i(\theta_k + \frac{\pi}{2}) P_k} U_k \dots e^{i\theta_1 P_1} U_1, \\ \mathcal{U}_k^{(\Phi)} &= U_{k+1}^\dagger e^{-i\theta_{k+1} P_{k+1}} \dots U_M^\dagger e^{-i\theta_M P_M} Z_0 e^{i\theta_M P_M} U_M \dots e^{i\theta_1 P_1} U_1,\end{aligned}$$

then, given a copy of  $|\varphi\rangle$ , one may attach an ancilla qubit labelled  $*$  in the  $|+\rangle$  state (in addition to the output qubit 0). In doing so, consider applying control- $\mathcal{U}_k^{(\Psi)}$  conditional on the ancilla being  $|0\rangle$ , and control- $\mathcal{U}_k^{(\Phi)}$  conditional on the ancilla being  $|1\rangle$ . This produces the state

$$\frac{1}{\sqrt{2}} (|0\rangle |\Psi_k\rangle + |1\rangle |\Phi_k\rangle).$$

Measuring  $X$  on the ancilla qubit, the expectation is

$$\begin{aligned}\frac{1}{2} (\langle 0 | \langle \Psi_k | + \langle 1 | \langle \Phi_k | ) X_* (|0\rangle |\Psi_k\rangle + |1\rangle |\Phi_k\rangle) &= \text{Re} \langle \Phi_k | \Psi_k \rangle \\ &= \frac{1}{2} \partial_{\theta_k} \text{QNN}_{\vec{\theta}}(|\varphi\rangle).\end{aligned}$$

This implicitly gives an operator on  $|+\rangle |0\rangle |\varphi\rangle$  whose expectation value is  $\frac{1}{2} \partial_{\theta_k} \text{QNN}_{\vec{\theta}}(|\varphi\rangle)$ . Moreover, we can implement this measurement with  $O(M)$  quantum operations.

## D.2 Proof of Theorem 9

In order to prove Theorem 9, we need to discuss and modify two concepts: online learning and threshold search [[Aaronson et al., 2018](#), [Bădescu and O'Donnell, 2021](#)].

### D.2.1 Online learning of quantum states

As in [Aaronson et al. \[2018\]](#), suppose we have access to a stream  $(E_1, b_1), \dots, (E_M, b_M)$  where each  $b_k = \langle \psi | E_k | \psi \rangle$ . We want to compute hypothesis states  $\omega_1, \dots, \omega_M$ , which are mixed states stored in classical memory, such that

- $\omega_k$  depends only on  $(E_1, b_1), \dots, (E_{k-1}, b_{k-1})$  (the online condition)
- $|\text{Tr}(E_k \omega_k) - \langle \psi | E_k | \psi \rangle| > \varepsilon$  for as few  $k$  as possible

One may produce the following theorem.

**Theorem 19.** [[Aaronson et al., 2018, Theorem 1](#)] *In the above setting, there is an explicit strategy for outputting hypothesis states  $\omega_1, \dots, \omega_M$  such that  $|\text{Tr}(E_k \omega_k) - \langle \psi | E_k | \psi \rangle| > \varepsilon$  for at most  $O(\frac{n}{\varepsilon^2})$  values of  $k$ . This holds even if the measurements  $b_k$  are noisy, and only satisfy  $|b_k - \langle \psi | E_k | \psi \rangle| \leq \frac{\varepsilon}{3}$*

Two remarks are in order: first, the problem setup and algorithm presented in Theorem 19 are both completely classical. Second, this theorem says nothing about computational runtime. Implementation of the algorithm in Theorem 19 using techniques from convex optimization will require runtime polynomial in the dimension of the Hilbert space  $\text{poly}(2^n)$ .

## D.2.2 Quantum Threshold Search

Bădescu and O’Donnell [2021] promote online learning to a shadow tomography protocol using a procedure which they call *threshold search*. This gives an improved version of the quantum private multiplicative weights algorithm proposed in Aaronson and Rothblum [2019]. The difference between the online learning setting from the previous section and general shadow tomography, is that in practice, we are typically *not* given the expectation values  $\{b_k\}$  and must measure them ourselves. This is where threshold search comes in handy. Suppose we possess some copies  $|\psi\rangle^{\otimes m}$  of a quantum state and are given a stream  $(E_1, a_1), \dots, (E_M, a_M)$  where each  $a_k$  is supposed to be a guess such that  $a_k \approx \langle \psi | E_k | \psi \rangle$ . Threshold search is a subroutine which, given only logarithmically many copies of the state, can check in an online fashion whether there is an  $a_k$  which errs by more than  $\varepsilon$ . More formally, we have the following theorem.

**Theorem 20.** [Bădescu and O’Donnell, 2021, Lemma 5.2] *Given  $m$  copies of an  $n$ -qubit quantum state  $|\psi\rangle^{\otimes m}$ ,  $M$  observables  $-1 \leq E_1, \dots, E_M \leq 1$ , and guesses  $a_1, \dots, a_M$ , there is an algorithm which outputs either*

- $|a_k - \langle \psi | E_k | \psi \rangle| \leq \varepsilon \forall k$ .
- Or  $|a_k - \langle \psi | E_k | \psi \rangle| > \frac{3}{4}\varepsilon$  when in fact  $|b_k - \langle \psi | E_k | \psi \rangle| \leq \frac{1}{4}\varepsilon$  for a particular  $k$  and value  $b_k$ .

*It does so using number of copies only*

$$m = O\left(\frac{\log^2 M}{\varepsilon^2}\right).$$

*Furthermore, the algorithm is online in the sense that:*

- *The algorithm is initially given only  $M$  and  $\varepsilon$ . It then selects  $m$  and obtains  $|\psi\rangle^{\otimes m}$ .*
- *Next, observable/threshold pairs  $(E_1, a_1), (E_2, a_2), \dots$  are presented to the algorithm in sequence. When each  $(E_k, a_k)$  is presented, the algorithm must either ‘pass’, or else halt and output  $|a_k - \langle \psi | E_k | \psi \rangle| > \frac{3}{4}\varepsilon$ .*
- *If the algorithm passes on all  $(E_k, a_k)$  pairs, then it ends by outputting  $|a_k - \langle \psi | E_k | \psi \rangle| \leq \varepsilon \forall k$*

We stress that this subroutine requires quantum memory and multi-copy measurements, and uses gentle measurements in an essential way. One is able to check whether or not  $a_k$  is inside the threshold without greatly disturbing the copies of the quantum state. We are now ready to state the full shadow tomography protocol from Bădescu and O’Donnell [2021]. The idea is to run the online learning algorithm from Theorem 19 in parallel with threshold search, and Bădescu and O’Donnell [2021, Theorem 1.4] tells us that this algorithm succeeds in outputting estimates  $|b_k - \langle \psi | E_k | \psi \rangle| \leq \varepsilon$  with high probability.

When applying Algorithm 1 to the observables corresponding to gradients described in Appendix D.1, we can exploit that the observables are related sequentially. In between each round  $k$ , we rotate both, the states stored in quantum memory and the classical online learner, so that implementing the measurement of the next gradient only requires runtime independent of  $M$ . Since these rotations are unitary and do not reduce the quality of any approximations, the same proof as Bădescu and O’Donnell [2021, Theorem 1.4] will apply. This establishes Theorem 9.

By Bădescu and O’Donnell [2021, Theorem 1.4], this algorithm obtains estimates  $|b_k - \frac{1}{2}\partial_{\theta_k} \text{QNN}_{\vec{\theta}}(|\varphi\rangle)| \leq \varepsilon$  for each  $k$  by taking the number of copies to be

$$m = O\left(\frac{n \log^2 M}{\varepsilon^4}\right).$$

---

**Algorithm 1** Online and gentle shadow tomography

---

**Input:**  $m$  copies of the unknown input state  $|\psi\rangle^{\otimes m}$ , in  $m$  registers each with  $n$  qubits.

**Output:** Estimates  $b_k \approx \langle \psi | E_k | \psi \rangle$

1. Set  $R = O(\frac{n}{\varepsilon^2})$  and  $m_0 = O(\frac{\log^2 M}{\varepsilon^2})$ . We need  $R$  batches, each with  $m_0$  copies, so  $m = Rm_0$  copies in total. This gives in total

$$m = O\left(\frac{n \log^2 M}{\varepsilon^4}\right)$$

2. Initialize the online learner  $\omega_1$  according to the online learning algorithm.
  3. Start with the first batch of copies  $|\psi\rangle^{\otimes m_0}$ .
  4. For each  $k = 1, \dots, M$ :
    - (a) Use the online learner to predict  $a_k = \text{Tr}(E_k \omega_k)$ .
    - (b) Use threshold search to check  $|a_k - \langle \psi | E_k | \psi \rangle|$ .
    - (c) If threshold search passes  $|a_k - \langle \psi | E_k | \psi \rangle| \leq \varepsilon$ ,
      - i. Output estimate  $b_k \leftarrow a_k$ .
      - ii. Leave the online learner unchanged  $\omega_{k+1} \leftarrow \omega_k$ .
    - (d) If threshold search concludes  $|a_k - \langle \psi | E_k | \psi \rangle| > \frac{3}{4}\varepsilon$  and in fact  $|b_k - \langle \psi | E_k | \psi \rangle| \leq \frac{1}{4}\varepsilon$ ,
      - i. Output estimate  $b_k$ .
      - ii. Update online learner with  $b_k \approx \langle \psi | E_k | \psi \rangle$  to get  $\omega_{k+1}$ .
      - iii. Discard the current batch and move onto a fresh batch  $|\psi\rangle^{\otimes m_0}$ .
- 

913 Moreover, the required number of quantum operations is

$$O(mM) = O\left(\frac{nM \log^2 M}{\varepsilon^4}\right)$$

914 This is quasi-linear in  $M$ . With naive storage of the entire density matrix of the hypothesis state  $\omega_k$ ,  
915 the classical cost is

$$M \cdot 2^{O(n)}$$

916 Which is also linear in  $M$ , but unfortunately exponential in the input size  $n$ . We present the  
917 full algorithm for gradient estimation using online shadow tomography with threshold search in  
918 Algorithm 2.

---

**Algorithm 2** Shadow tomography protocol for gradients of a quantum neural network
 

---

**Input:**  $m$  copies of the unknown input state  $|\varphi\rangle^{\otimes m}$  in  $m$  registers each with  $n$  qubits.

**Output:** Estimates  $b_k \approx \frac{1}{2} \partial_{\theta_k} \text{QNN}_{\vec{\theta}}(|\varphi\rangle)$  for  $k = 1, \dots, M$

1. Set  $R = O(\frac{n}{\varepsilon^2})$  and  $m_0 = O(\frac{\log^2 M}{\varepsilon^2})$ . We need  $R$  batches, each with  $m_0$  copies, so  $m = Rm_0$  copies in total. This gives

$$m = O\left(\frac{n \log^2 M}{\varepsilon^4}\right)$$

2. Define for each  $k = 1, \dots, M$

$$|\psi_k\rangle = \frac{1}{\sqrt{2}}(|0\rangle|\Psi_k\rangle + |1\rangle|\Phi_k\rangle)$$

and recall from Remark 18 that

$$\langle\psi_k|X_*|\psi_k\rangle = \frac{1}{2} \partial_{\theta_k} \text{QNN}_{\vec{\theta}}(|\varphi\rangle)$$

3. Attach the output qubit and an ancilla qubit in the  $|+\rangle$  state to each register. Label the output qubit 0 and the ancilla qubit  $*$ .
  4. To each register, do the following:
    - (a) Apply control- $\mathcal{U}_1^{(\Psi)}$  conditional on the ancilla being  $|0\rangle$ . This requires  $O(1)$  quantum operations.
    - (b) Apply control- $\mathcal{U}_1^{(\Phi)}$  conditional on the ancilla being  $|1\rangle$ . This requires  $O(M)$  quantum operations. This step is analogous to the initial forward pass in classical backpropagation.
    - (c) This produces the state  $|\psi_1\rangle^{\otimes m}$ .
  5. Initialize the online learner  $\omega_1$  according to the online learning algorithm.
  6. Start with the first batch of copies  $|\psi_1\rangle^{\otimes m_0}$
  7. For  $k = 1, \dots, M$ , do the following. This loop is analogous to the backward pass in classical backpropagation.
    - (a) Use the online learner to predict  $a_k = \text{Tr}(X_* \omega_k)$ .
    - (b) Use threshold search to check  $|a_k - \langle\psi_k|X_*|\psi_k\rangle|$ . This takes time independent of  $M$ .
    - (c) If threshold search passes  $|a_k - \langle\psi_k|X_*|\psi_k\rangle| \leq \varepsilon$ ,
      - i. Output estimate  $b_k \leftarrow a_k$ .
      - ii. Leave the online learner unchanged  $\omega_{k+1} \leftarrow \omega_k$ .
    - (d) If threshold search concludes  $|a_k - \langle\psi_k|X_*|\psi_k\rangle| > \frac{3}{4}\varepsilon$  and in fact  $|b_k - \langle\psi_k|X_*|\psi_k\rangle| \leq \frac{1}{4}\varepsilon$ ,
      - i. Output estimate  $b_k$ .
      - ii. Update online learner with  $b_k \approx \langle\psi_k|X_*|\psi_k\rangle$  to get  $\omega_{k+1}$ .
      - iii. Discard the current batch and move onto a fresh batch.
    - (e) To each register in the current batch *and the unused batches*, do the following:
      - i. Apply control- $(e^{i(\theta_{k+1} + \frac{\pi}{2})} P_{k+1} U_{k+1} e^{-i\frac{\pi}{2} P_k})$  conditional on the ancilla being  $|0\rangle$ . This implements  $\mathcal{U}_{k+1}^{(\Psi)} (\mathcal{U}_k^{(\Psi)})^{-1}$ , and only requires  $O(1)$  quantum operations.
      - ii. Apply control- $e^{i\theta_{k+1} P_{k+1}} U_{k+1}$  conditional on the ancilla being  $|1\rangle$ . This implements  $\mathcal{U}_{k+1}^{(\Phi)} (\mathcal{U}_k^{(\Phi)})^{-1}$ , and only requires  $O(1)$  quantum operations.
      - iii. This produces in each batch (a noisy approximation to) the state  $|\psi_{k+1}\rangle^{\otimes m_0}$ .
    - (f) Also apply the rotations in Step (e) to the hypothesis state  $\omega_{k+1}$  in classical memory. The online learner now approximates  $|\psi_{k+1}\rangle\langle\psi_{k+1}|$ .
-

## 919 E Fully gentle gradient estimation

920 In this section, we motivate for a need to perform sequential and gentle measurements to individual  
 921 gradient states, as opposed to superpositions of them. Thereafter, we discuss general strategies based  
 922 on gentle measurements alone, performed on single and multiple copies.

### 923 E.1 Considering individual gradient states

924 While we briefly motivated the need for a sequential reuse of information in measurements in the  
 925 main text, here we further motivate such a construction as a necessary, but perhaps not sufficient  
 926 condition for our purposes. Given that one can create a superposition over all the potential gradient  
 927 components at a cost that only requires a single function call, it is natural to ask if this ability gives us  
 928 any headway in achieving our goals. Consider exploiting the superposition over all gradient states

$$|\Psi\rangle = \sum_{k=1}^M c_k |A_k\rangle \prod_{j \in A} U_j |0\rangle = \sum_{k=1}^M c_k |A_k\rangle |\psi_k\rangle, \quad (31)$$

929 using at most  $cM$  calls to the family  $\{U_j\}$  and some ancillary qubits  $|A_k\rangle$  associated with the  
 930  $k^{\text{th}}$  gradient state.<sup>2</sup> Creating such a superposition weakens our ability to extract each gradient  
 931 component's signal upon measurement, and thus, requires more samples to distinguish between  
 932 gradient components with a desired precision. From a cost perspective, it remains optimal or  
 933 equivalent to consider gradient states  $|\psi_k\rangle$  individually. To make this more concrete, consider a state  
 934 discrimination task, with the following lemma at hand.

935 **Lemma 21** (Optimal two-state discrimination). *Any quantum algorithm that distinguishes two states*  
 936  *$\rho_1$  and  $\rho_2$  using a single copy of each state with probability at least 0.9 requires*

$$\frac{1}{2} + \frac{1}{2} \|\rho_1 - \rho_2\|_{\text{tr}} \geq 0.9. \quad (32)$$

937 Now we may proceed to the state discrimination task, where it is clear a superposition is not helpful.

938 **Proposition 22.** *Consider the two-state discrimination task for two scenarios. First, given  $|\psi_m\rangle$  and*  
 939  *$|\phi_m\rangle$ , where  $\langle\psi_m|\phi_m\rangle = 0$ , there is a measurement strategy that can distinguish the states with a*  
 940 *single measurement. Second, given the states*

$$|\Psi\rangle = \frac{1}{\sqrt{M}} \sum_{k=1}^M |A_k\rangle |\psi_k\rangle, \quad (33)$$

941 and

$$|\Phi\rangle = \frac{1}{\sqrt{M}} \sum_{k=1}^M |A_k\rangle |\phi_k\rangle, \quad (34)$$

942 where  $|\psi_k\rangle = |\phi_k\rangle$  for every  $k$  except the  $m^{\text{th}}$  component and  $\langle\psi_m|\phi_m\rangle = 0$  as before, then  $\Omega(M)$   
 943 copies are required by any strategy aiming to discriminate  $|\Psi\rangle$  from  $|\Phi\rangle$  with reasonably high success  
 944 probability.

945 *Proof.* The first scenario follows straightforwardly from Lemma (21) since there is no overlap  
 946 between  $|\psi_m\rangle$  and  $|\phi_m\rangle$  – hence, their trace distance is 1 and Equation (32) always holds. For states  
 947 in uniform superposition over all  $M$  components, the overlap is  $1 - 1/M$  which is close to unity  
 948 for large  $M$ , indicating the difficulty of the task when the states mostly overlap. Given access to  $N$   
 949 copies of  $|\Psi\rangle$  and  $|\Phi\rangle$ , to discriminate with probability at least 0.9 requires

$$\frac{1}{2} + \frac{1}{2} \sqrt{1 - |\langle\Psi|\Phi\rangle|^{2N}} \geq 0.9, \quad (35)$$

950 or equivalently

$$\left(1 - \frac{1}{M}\right)^{2N} \leq 0.36, \quad (36)$$

951 implying that  $N = \Omega(M)$  in order to discriminate successfully with the desired probability.  $\square$

---

<sup>2</sup> $c$  is some small constant.

952 From Proposition (22), we have the immediate corollary.

953 **Corollary 23.** *It is either optimal or equivalent in cost to consider gradient states individually, as*  
 954 *opposed to a superposition over them all.*

955 *Proof.* Replacing the uniform superposition in Equations (33) and (34) to the more general,  $|\Psi\rangle =$   
 956  $\sum_{k=1}^M c_k |A_k\rangle |\psi_k\rangle$  and  $|\Phi\rangle = \sum_{k=1}^M c_k |A_k\rangle |\phi_k\rangle$ , the number of samples needed to discriminate  
 957 the  $m^{\text{th}}$  component scales as  $N \sim 1/c_m^2$ . Since  $c_m^2 \in [0, 1]$ , it is clear that  $c_m^2 = 1$  is optimal. If  
 958 there are  $M$  components, then  $c_m^2 \sim 1/M$  and hence,  $N \sim M$ . Assuming the superposition state  $|\Psi\rangle$   
 959 incurs a cost proportional to  $M$ , the number of samples required to differentiate between components  
 960 in the wave function will imply an overall cost that scales as  $M^2$ .  $\square$

## 961 E.2 A case for sequential and gentle measurement

962 Whilst the cost equivalence presented in Corollary 23 implies no benefit from a superposition of  
 963 gradient states, it also suggests that, if one is to obtain backpropagation scaling, individual gradient  
 964 states must be utilized in a more resource efficient manner. Drawing inspiration from backpropagation,  
 965 if one could instead use the state  $|\psi_k\rangle$  to make a measurement, then update it to  $|\psi_{k+1}\rangle$  without  
 966 substantially disturbing it, it would then be possible to perform all of the measurements at an  
 967 overall cost scaling like  $O(M)$ . We illustrate such a benefit by means of an example using fictitious  
 968 non-destructive measurements in Algorithm 3.

---

### Algorithm 3 Gradient estimation with a modified, non-destructive swap test

---

**Input:** Three registers initialized to  $|+\rangle |0\rangle |0\rangle$

**Output:** Gradient vector estimate for  $F(\theta)$

1. Apply  $U(\theta) = U_M \dots U_1$  to the second register, controlled on the first being 0. Cost  $\sim M$ .
2. Apply  $OU(\theta)$  to the third register, conditional on the first being 1. Cost  $\sim M$  and the state becomes

$$|+\rangle |0\rangle |0\rangle \rightarrow \frac{1}{\sqrt{2}}(|0\rangle |\psi_M\rangle |0\rangle + |1\rangle |0\rangle |\lambda\rangle),$$

where  $|\psi_M\rangle = U_M \dots U_1 |0\rangle$  and  $|\lambda\rangle = OU_M \dots U_1 |0\rangle$ . By assumption, all  $U_j$  and  $O$  are hermitian and unitary.

3. For  $k$  in  $\{M, M-1, \dots, 1\}$ :
  - (a) Apply and update  $|\psi_k\rangle = -iP_k |\psi_k\rangle$  conditioned on ancilla being 0. Cost  $\sim 1$ .
  - (b) Perform a non-destructive swap test on the state

$$\frac{1}{\sqrt{2}}(|0\rangle |\psi_k\rangle |0\rangle + |1\rangle |0\rangle |\lambda\rangle)$$

to estimate  $[F'(\theta)]_{\theta_k} = -2 \text{Im} \langle \lambda | \psi_k \rangle$  with no damage to the state. Cost  $\sim 1$ .

- (c) If  $k > 1$  apply and update  $|\lambda\rangle = U_k^\dagger |\lambda\rangle$  conditional on ancilla being 1. Cost  $\sim 1$ .
  - (d) If  $k > 1$  apply and update  $|\psi_{k-1}\rangle = U_k^\dagger (iP_k) |\psi_k\rangle$  conditional on ancilla being 0. Cost  $\sim 1$ .
- 

969 The procedure naturally breaks down in a real quantum computer at Step (3b) due to the reliance on  
 970 non-destructive measurements. Substituting these for gentle measurements, which are only partially  
 971 non-destructive but, at least, theoretically possible, one may still aspire to exploit the structure of the  
 972 problem and achieve backpropagation scaling as in Algorithm 3.

## 973 E.3 Gentle measurement on single copies

974 The need to reuse a state enough times to extract every gradient component, imposes constraints on  
 975 the gentleness of measurements made. While the use of multiple copies may enhance the ability  
 976 to leverage gentle measurements, it is straightforward to see why this approach would not work in  
 977 general, when given access to a single copy of  $\rho$ . Using a scheme like the modified swap test in

Algorithm 3, implies that each measurement must be on average  $1/M$ -gentle in order to reuse the state  $M$  times to extract each gradient component without damaging the state to the point that at least one observable on the state is completely wrong. Enforcing such a constraint, leads to measurements that are trivial – i.e. they barely depend on  $\rho$  and cannot yield enough information about gradients. We recap some useful lemmas whose proofs can be found in Aaronson and Rothblum [2019] to make this more concrete.

**Lemma 24** (Additivity of damage). *Let  $\rho$  be some mixed state and let  $S_1, S_2, \dots, S_M$  be general quantum operations. Suppose for all  $j$ , we have*

$$\|S_j(\rho) - \rho\|_{\text{tr}} \leq \alpha_j,$$

then

$$\|S_M(S_{M-1}(\dots S_1(\rho))) - \rho\|_{\text{tr}} \leq \alpha_1 + \dots + \alpha_M.$$

**Lemma 25** (Trivial measurement). *Given a measurement  $M$  and parameter  $\eta \geq 0$ , suppose that for every two orthogonal pure states  $|\psi\rangle$  and  $|\phi\rangle$ , and every possible outcome  $y$  of  $M$ , we have*

$$\Pr[M(|\psi\rangle) \text{ outputs } y] \leq e^\eta \Pr[M(|\phi\rangle) \text{ outputs } y].$$

*Then  $M$  is  $\eta$ -trivial. Further, let  $E_1 + \dots + E_k = I$  be the POVM elements of  $M$ . Assume without loss of generality that the outcome  $y$  corresponds to the element  $E = E_1$ . Then,*

$$\langle \psi | E | \psi \rangle \leq e^\eta \langle \phi | E | \phi \rangle,$$

*holds for all states, not just all orthogonal  $|\psi\rangle, |\phi\rangle$ .*

**Lemma 26** (Triviality lemma). *Suppose a measurement is  $\alpha$ -gentle on all states. Then the measurement is  $\ln\left(\frac{1+4\alpha}{1-4\alpha}\right)$ -trivial —so in particular,  $O(\alpha)$ -trivial, provided  $\alpha \leq \frac{1}{4.01}$ .*

Equipped with these lemmas, we proceed to demonstrate the difficulty of gentle gradient estimation with single-copy access to a pure state.

**Theorem 27.** *A sequence of  $M$  measurements on a single-copy pure state that is  $1/M$ -gentle at every step to extract every gradient component, will be trivial.*

*Proof.* Choose a circuit such that gradient state differs substantially, i.e.  $\| |\psi_i\rangle\langle\psi_i| - |\psi_j\rangle\langle\psi_j| \|_{\text{tr}} = 1$  for all measurements. In other words, there is a unitary that must be applied to advance from gradient component  $i$  to  $j$ , otherwise there will be a measurement that produces the incorrect result if no such unitary is applied. Fix  $\{\Lambda, I - \Lambda\}$  as the POVM elements of a gentle measurement. Assume without loss of generality that the outcome of measuring the gradient component with respect to a given state corresponds to the element  $\Lambda = A^\dagger A$ , and

$$\|S(\rho) - \rho\|_{\text{tr}} \leq \alpha \tag{37}$$

where

$$S(\rho) = \frac{A\rho A^\dagger}{\text{Tr}[\Lambda\rho]}.$$

Using a single copy of  $\rho = |\psi\rangle\langle\psi|$  to extract all  $M$  gradient components, requires advancing the state after measuring gently at each step, and thus, each measurement step must be on average  $1/M$ -gentle to ensure

$$\left\| S(U_M S(U_{M-1} \dots S(U_2 S(U_1 \rho U_1^\dagger) U_2^\dagger) \dots U_{M-1}^\dagger) U_M^\dagger) - \rho_M \right\|_{\text{tr}} < 1, \tag{38}$$

where  $\rho_M$  is the density matrix representation of the advanced gradient state  $|\psi_M\rangle = U_M \dots U_2 U_1 |\psi\rangle$ . If we allowed for any more damage at a particular step, we could eventually reach a point where subsequent measurements yield incorrect results, as the cumulative damage to the state may exceed 1. While the gentleness could be distributed across each gradient component in different ways, from the above lemma, we see that the more gentle the operator, the more trivial it becomes. Hence, if we had  $(M - 1)$  0-gentle measurements, they would be infinitely trivial and provide no information with 1 informative measurement. Hence, the least trivial set of measurements that achieve an average of  $1/M$  gentleness would be to have each measurement be  $1/M$  gentle. By Lemma (26), then each measurement will be  $O(1/M)$ -trivial, which implies

$$\text{Tr}[\Lambda\rho_i] \leq e^{1/M} \text{Tr}[\Lambda\rho_{i+1}]$$

for any two gradient states  $\rho_i, \rho_{i+1}$ . As  $M$  increases, the estimates for all gradient components will converge. Therefore, the measurement operator has an exponentially vanishing dependence on the input states themselves and hence, provides little-to-no information about the gradient components.  $\square$

#### 1021 E.4 Multiple copies and non-collapsing measurements

1022 Non-adaptive, non-collapsing measurements are, by assumption, measurements that do not disturb the  
 1023 state of a quantum system at all. Under this assumption, the complexity class, non-adaptive Collapse-  
 1024 free Quantum Polynomial time (naCQP) was introduced. With this ability, searching through an  
 1025 unstructured  $M$ -element list can be performed in  $\tilde{O}(M^{\frac{1}{3}})$  time, which is faster than the optimal lower  
 1026 bound of  $O(M^{\frac{1}{2}})$  given by Grover’s search algorithm [Grover, 1996]. Importantly, time complexity in  
 1027 naCQP is measured as the number of oracle queries plus the number of non-collapsing measurements.  
 1028 This definition is considered more fitting, since any task in naCQP allows for exponentially many  
 1029 non-collapsing measurements to be made and should thus, be accounted for.

1030 Interestingly, one may still violate Grover’s bound by allowing for approximately non-collapsing  
 1031 measurements. First, note that

$$\|\rho - \rho'\|_{\text{tr}} = 0$$

1032 for non-collapsing measurements, where  $\rho'$  is the normalized state after measurement. In the  
 1033 approximately non-collapsing regime, assume that a measurement operator can be applied to a tensor  
 1034 product of the state  $\rho$  such that

$$\|\rho^{\otimes m} - \rho'^{\otimes m}\|_{\text{tr}} \leq \alpha.$$

1035 As  $\alpha \rightarrow 0$ , we recover the non-collapsing measurement regime. In the gradient setting, approximately  
 1036 non-collapsing measurements are merely gentle measurements. This leads to the following.

1037 **Proposition 28.** *A sufficiently gentle measurement used for gradient extraction can solve an unstruc-*  
 1038 *tured search problem in  $\tilde{O}(M^{\frac{1}{3}})$  time.*

1039 *Proof.* Reformulating the gentle gradient task as a search problem, let  $M = 2^n$ . Consider the state

$$\sin((2i+1)\theta) |x\rangle |1\rangle + \cos((2i+1)\theta) \sum_{y \in \{0,1\}^n, y \neq x} 2^{-\frac{M-1}{2}} |y\rangle |0\rangle \quad (39)$$

1040 after applying  $i = M^{\frac{1}{3}}$  Grover iterations, where  $|x\rangle$  is the marked state. The probability of measuring  
 1041 the marked state is  $|\sin((2i+1)\theta)|^2 \approx 1/M^{\frac{1}{3}}$ . Suppose we can create the state  $|\psi\rangle^{\otimes m}$ , where  
 1042  $m = O(\log(M))$  by using  $M^{\frac{1}{3}} \log(M)$  Grover queries. By having access to multiple copies of  $|\psi\rangle$ ,  
 1043 assume that one may implement a  $1/M$ -gentle measurement on the copies as required for gradient  
 1044 estimation. Then, the probability of observing the marked state after a single gentle measurement  
 1045 is  $\log(M)/M^{\frac{1}{3}}$ . By performing  $M^{\frac{1}{3}}$  gentle measurements on the  $\log(M)$  copies, the probability of  
 1046 obtaining the marked state at least once is greater than  $1 - e^{-\log(M)} = 1 - \frac{1}{M}$ , using only  $\tilde{O}(M^{\frac{1}{3}})$   
 1047 Grover oracle queries and  $O(M^{\frac{1}{3}})$  partially non-collapsing measurements, and thus, runs in time  
 1048  $\tilde{O}(M^{\frac{1}{3}})$ .  $\square$
